# Direct Inhibition of GSK3 $\beta$ by the Phosphorylated Cytoplasmic Domain of LRP6 in Wnt/ $\beta$ -Catenin Signaling

Shunfu Piao<sup>1</sup>, Sun-Hye Lee<sup>2</sup>, Hyunjoon Kim<sup>3</sup>, Soohwan Yum<sup>1</sup>, Jennifer L. Stamos<sup>4</sup>, Yongbin Xu<sup>1</sup>, Su-Jin Lee<sup>2</sup>, Jaewon Lee<sup>1</sup>, Sangtaek Oh<sup>5</sup>, Jin-Kwan Han<sup>3</sup>, Bum-Joon Park<sup>2</sup>, William I. Weis<sup>4</sup>, Nam-Chul Ha<sup>1\*</sup>

**1** College of Pharmacy and Research Institute for Drug Development, Pusan National University, Busan, Korea, **2** Department of Molecular Biology, College of Natural Sciences, Pusan National University, Busan, Korea, **3** Division of Molecular and Life Sciences, POSTECH, Pohang, Korea, **4** Departments of Structural Biology and Molecular & Cellular Physiology, Stanford University School of Medicine, Stanford, California, United States of America, **5** PharmcoGenomics Research Center, Inje University, Busan, Korea

## Abstract

Wnt/ $\beta$ -catenin signaling plays a central role in development and is also involved in a diverse array of diseases. Binding of Wnts to the coreceptors Frizzled and LRP6/5 leads to phosphorylation of PPPSPxS motifs in the LRP6/5 intracellular region and the inhibition of GSK3 $\beta$  bound to the scaffold protein Axin. However, it remains unknown how GSK3 $\beta$  is specifically inhibited upon Wnt stimulation. Here, we show that overexpression of the intracellular region of LRP6 containing a Ser/Thr rich cluster and a PPPSPxS motif impairs the activity of GSK3 $\beta$  in cells. Synthetic peptides containing the PPPSPxS motif strongly inhibit GSK3 $\beta$  *in vitro* only when they are phosphorylated. Microinjection of these peptides into *Xenopus* embryos confirms that the phosphorylated PPPSPxS motif potentiates Wnt-induced second body axis formation. In addition, we show that the Ser/Thr rich cluster of LRP6 plays an important role in LRP6 binding to GSK3 $\beta$ . These observations demonstrate that phosphorylated LRP6/5 both recruits and directly inhibits GSK3 $\beta$  using two distinct portions of its cytoplasmic sequence, and suggest a novel mechanism of activation in this signaling pathway.

**Citation:** Piao S, Lee S-H, Kim H, Yum S, Stamos JL, et al. (2008) Direct Inhibition of GSK3 $\beta$  by the Phosphorylated Cytoplasmic Domain of LRP6 in Wnt/ $\beta$ -Catenin Signaling. PLoS ONE 3(12): e4046. doi:10.1371/journal.pone.0004046

**Editor:** Wenqing Xu, University of Washington, United States of America

**Received:** August 19, 2008; **Accepted:** November 27, 2008; **Published:** December 24, 2008

**Copyright:** © 2008 Piao et al. This is an open-access article distributed under the terms of the Creative Commons Attribution License, which permits unrestricted use, distribution, and reproduction in any medium, provided the original author and source are credited.

**Funding:** This project was supported by a Korea Research Foundation Grant (KRF-2007-C00620) to N.-C.H. and by U.S. National Institutes of Health grant GM56169 to W.I.W. The Basic Research Program of the Korea Science & Engineering Foundation (R01-2006-000-10521-0), and The Advanced Basic Research Laboratory Program (R14-2002-012-01001-0) of KRF partly supported this project. The funders had no role in study design, data collection and analysis, decision to publish, or preparation of the manuscript.

**Competing Interests:** The authors have declared that no competing interests exist.

\* E-mail: hnc@pusan.ac.kr

## Introduction

The Wnt/ $\beta$ -catenin signaling pathway is essential for normal development, and is inappropriately activated in a number of cancers and other diseases [1]. This signaling pathway functions by regulating the phosphorylation and degradation of the transcription co-activator  $\beta$ -catenin [2]. In the absence of Wnt,  $\beta$ -catenin is phosphorylated by GSK3 $\beta$  in a complex that includes Axin, GSK3 $\beta$ , and  $\beta$ -catenin [2]. Phosphorylated  $\beta$ -catenin is targeted for degradation via phosphorylation-dependent ubiquitination [3,4]. Wnt stimulation shuts off  $\beta$ -catenin degradation by inhibiting GSK3 $\beta$  in the Axin complex [5]. This inhibition is believed to be the key event in the activation of the Wnt/ $\beta$ -catenin signaling pathway [6,7].

Wnt/ $\beta$ -catenin signal transduction is triggered at the plasma membrane by two distinct receptors, the serpentine receptor Frizzled, and the single-transmembrane receptor LRP6 or LRP5 (LRP6/5) [7–9]. The extracellular ligand Wnt is thought to promote the assembly of Frizzled, LRP6/5, the cytoplasmic protein Dishevelled and the Axin complex, resulting in the sequential phosphorylation of two Ser/Thr residues in each of five cytoplasmic PPPSPxS motifs of LRP6/5 [10,11]. The PPPSPxS motif was proposed to be dually-phosphorylated by membrane-recruited GSK3 $\beta$  [10] in the Axin complex and membrane-localized CK1 $\gamma$  [12,13]. The dually-phosphorylated PPPSPxS motifs are known to mediate the interaction between LRP6/5 and

the Axin complex [14], which somehow leads to the activation of the Wnt/ $\beta$ -catenin pathway.

It was previously reported that the overexpression of the intracellular region of LRP6 (residues 1417–1613 of the human sequence), a region that contains a Ser/Thr rich cluster and five PPPSPxS motifs, constitutively activated Wnt/ $\beta$ -catenin signaling and potentiated Wnt3a-induced Wnt/ $\beta$ -catenin signaling [15]. This group also reported that the purified intracellular region of LRP6/5 attenuated GSK3 $\beta$  activity by 20% *in vitro*, strongly indicating that this region of LRP6/5 contains the inhibitory sequence targeting GSK3 $\beta$  and is thus responsible for activating the Wnt/ $\beta$ -catenin signaling pathway in cell [16]. Very recently, it was reported that an intracellular region of LRP6, which contains the Ser/Thr rich cluster and the five PPPSPxS motifs, inhibits the phosphorylation of  $\beta$ -catenin by GSK3 $\beta$ , and that an intact PPPSPxS motif is required [17]. Davison et al. reported that a truncated receptor containing a transmembrane domain and a shorter fragment of LRP6 (residues 1460–1505; referred to as miniC), including the Ser/Thr rich cluster and the first PPPSPxS motif, can activate the Wnt/ $\beta$ -catenin pathway [12]. In particular, they observed CK1-dependent phosphorylation of the PPPSPxS motif and the recruitment of Axin to the membrane, identifying these steps as crucial for the activation of the pathway [12]. However, the actual mechanism by which the GSK3 $\beta$  is inhibited in the Wnt signaling pathway has been obscure.

In this study, we examine the actions of the intracellular region of LRP6/5 on GSK3 $\beta$  in Wnt/ $\beta$ -catenin signaling. We find that phosphorylated LRP6 binds to and directly inhibits GSK3 $\beta$ , and that GSK3 $\beta$  can bridge LRP6 and Axin. These findings lead to a reinterpretation of earlier studies and allow us to propose a molecular mechanism for the activation of the Wnt/ $\beta$ -catenin signaling pathway.

## Results

### The LRP6 PPPSPxS motif can inhibit GSK3 $\beta$ both toward $\beta$ -catenin and glycogen synthase

We hypothesized that the intracellular LRP6 region acts as a direct GSK3 $\beta$  inhibitor in Wnt/ $\beta$ -catenin signal propagation. Within the intracellular region of LRP6, the miniC region of LRP6, especially the PPPSPxS motif, might be the GSK3 $\beta$  inhibitory sequence; replacement of the cytoplasmic domain of LRP6 with this region can induce Wnt/ $\beta$ -catenin signaling even in the absence of the LRP6 extracellular region [12,13].

To test our hypothesis, we constructed a GFP-fusion protein based on LRP6-miniCL (Fig. 1A), which is similar to the miniC construct (this protein is called GFP-miniCL; Fig. 1). We also constructed a mutant of LRP6-miniCL containing an Ala substitution at Ser1490 as a GFP-fusion construct (GFP-miniCLMT; Fig. 1). We transfected the constructs into A549 (Figs. 1B and C) and HepG2 cells (Figs. S1 and S2) and analyzed the distribution, expression, and phosphorylation state of each construct, and their effects on  $\beta$ -catenin. Both wild type and mutant miniCL were evenly distributed throughout the cytoplasm (GF; Fig. 1B and Fig. S1). However, only wild-type miniCL dramatically increased the total amount of cellular  $\beta$ -catenin and promoted the translocation of  $\beta$ -catenin into the nucleus ( $\beta$ -cat; Fig. 1B and Fig. S1). We consistently observed an increased level of  $\beta$ -catenin with the miniCL transfection in western blot analyses ( $\beta$ -catenin; Fig. 1C and Fig. S2). These observations are consistent with the results of Cselenyi et al., who used the LRP6 cytoplasmic region containing the Ser/Thr rich cluster and five PPPSPxS motifs, and variant in which the first Ser residue of each PPPSPxS motif is replaced by Ala [17]. To confirm the activation of the Wnt/ $\beta$ -catenin signaling pathway, we measured the transcriptional activity of  $\beta$ -catenin using luciferase in 293 cells. Forced cytoplasmic expression of wild type miniCL, but not the mutant miniCLMT, significantly induced TOP-flash activity (Fig. 1D). These results suggest that the LRP6 miniCL works as an inhibitor of GSK3 $\beta$  regardless of its cellular localization, and that the PPPSPxS motif plays a crucial role in this effect.

The wild-type miniCL, but not the mutant miniCLMT, also suppressed phosphorylation of glycogen synthase (GS; p-GS in Fig. 1C) without the induction of phosphorylation of Ser9 in GSK3 $\beta$  (p-S9-GSK3 $\beta$ ; Fig. 1C). Suppression of GS phosphorylation normally occurs when GSK3 $\beta$  is phosphorylated at Ser9 by AKT as a part of the insulin/IGF-1 signaling pathway [18]. Our data indicate that the miniCL protein can inhibit GSK3 $\beta$  independently of AKT activity when this LRP6 fragment is overexpressed in the cytoplasm, implying that it can act as a general inhibitor of GSK3 $\beta$ . Note that under physiological conditions, such inhibition would not occur due to the localization of the LRP6/GSK3 $\beta$ /Axin complex at the plasma membrane (see below).

### Phosphorylated PPPSPxS of LRP6/5 motif directly inhibits GSK3 $\beta$ *in vitro*

Since phosphorylation of the PPPSPxS motif in the miniCL region of LRP6/5 is correlated with the inhibition of GSK3 $\beta$ , we asked whether the PPPSPxS motif can directly inhibit GSK3 $\beta$  *in*

*vitro*. We synthesized one dually-phosphorylated (NPPPpSPAp-TERSH, where pS or pT designates a phosphorylated Ser or Thr residue), two singly-phosphorylated (NPPPSPApTERSH and NPPPpSPATERSH) and one non-phosphorylated (NPPPSPATERSH) peptides derived from the first PPPSPxS motif of LRP6 (Fig. 1A). To measure the GSK3 $\beta$  activity toward  $\beta$ -catenin *in vitro*, we utilized a  $\beta$ -catenin N-terminal fragment (residues 1–133), whose Ser45 was prephosphorylated by CK1, as a substrate (Ha et al., 2004). Each synthetic peptide was added to a reaction mixture containing the purified GSK3 $\beta$  enzyme and the substrate  $\beta$ -catenin N-terminal fragment. The GSK3 $\beta$  activity was determined through measurement of the intensity of the supershifted (retarded)  $\beta$ -catenin bands (Fig. S3), which represent the phosphorylated product species (Fig. S4), on an SDS-polyacrylamide gel (Figs. S3, S4, S5, S6, S7). The dually-phosphorylated peptide showed a strong inhibitory effect on GSK3 $\beta$  in a concentration-dependent manner (1–100  $\mu$ M), while the non-phosphorylated peptide did not show any inhibitory effect on the GSK3 $\beta$  activity at concentrations up to 100  $\mu$ M (Fig. 2A). The two singly-phosphorylated peptides showed distinct inhibitory effects. Whereas the peptide phosphorylated at the second Ser/Thr residue [PPPSPx(p)S; Fig. 2A] exhibited only a marginal inhibitory effect at 100  $\mu$ M, the peptide phosphorylated at the first Ser/Thr [PPP(p)SPxS; Fig. 2A] exhibited a strong inhibitory effect close to that of the dually-phosphorylated peptide (Fig. 2A). Our results demonstrate that the dually-phosphorylated PPPSPxS motif directly inhibits GSK3 $\beta$ , and that phosphorylation at the first Ser residue plays a more important role. This corresponds well with the results of Zeng et al., who reported that the first Ser residue in the PPPSPxS motif has a more important role in Wnt/ $\beta$ -catenin signaling than the second Ser residue [13]. Since the non-phosphorylated peptide does not inhibit, the inhibition is not due to competition between this potential alternative substrate and the  $\beta$ -catenin substrate.

Based on steady-state kinetic analyses [19], the dually phosphorylated LRP6 peptide competitively inhibits GSK3 $\beta$  with an apparent inhibition constant ( $K_i$ ) of 13  $\mu$ M. Thus, the phosphorylated LRP6 motif is a much stronger inhibitor of GSK3 $\beta$  than the phosphorylated N-terminal fragment of GSK3 $\beta$  ( $K_i \sim 700 \mu$ M), which is a known pseudosubstrate inhibitor of GSK3 $\beta$  [20] (Fig. 2B).

It was noted above that cytoplasmically expressed miniCL inhibits phosphorylation of GS. To further test whether the dually-phosphorylated PPPSPxS peptide can act as a general inhibitor of GSK3 $\beta$ , we tested its effect on GSK3 $\beta$ -mediated phosphorylation of an Axin fragment (mouse Axin amino acids 512–650), in which Ser614 is the only site phosphorylated by GSK3 $\beta$  *in vitro* and *in vivo* [21]. As shown in Fig. 2C, the phosphorylated PPPSPxS peptides inhibited GSK3 $\beta$ -mediated phosphorylation of the Axin fragment as efficiently as on the primed  $\beta$ -catenin N-terminal fragment substrate. This result is consistent with the observation that the intracellular region of LRP6 decreased GSK3 $\beta$  phosphorylation of an unprimed substrate Tau protein and the primed substrate full-length  $\beta$ -catenin *in vitro* [16]. In addition, the phosphorylated PPPSPxS peptides did not show any inhibitory effect on CK1 when we use the unphosphorylated  $\beta$ -catenin fragment as a substrate (data not shown), confirming that the phosphorylated PPPSPxS peptide inhibits only GSK3 $\beta$ . Collectively, these data suggest that the phosphorylated PPPSPxS motif of LRP6/5 can act as a general inhibitor of GSK3 $\beta$  *in vitro*.

### Axin-bound GSK3 $\beta$ is inhibited by the phosphorylated LRP6 PPPSPxS motifs

We next sought to determine if the phosphorylated LRP6 motifs are capable of inhibiting GSK3 $\beta$  in the Axin complex. An *in vitro*

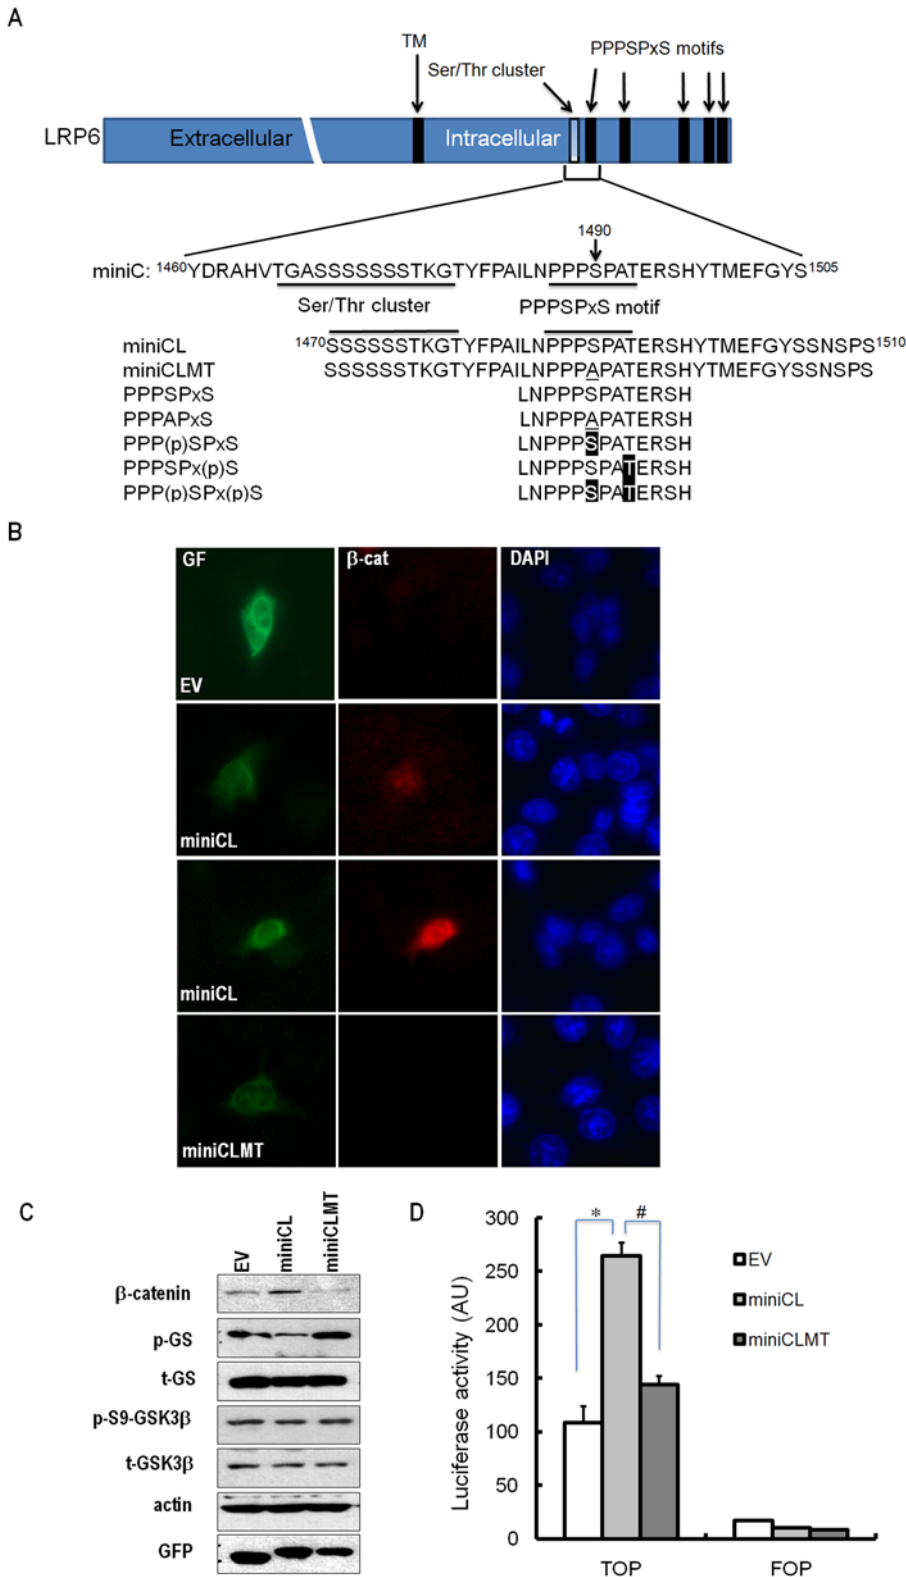

**Figure 1. LRP6 constructs and their cytoplasmic overexpression in cell.** (A) Schematic representation of the full-length LRP6 and amino acid sequences of LRP6 intracellular fragments used in this study. The Ser/Thr rich cluster and PPPSPxS motif are underlined in each sequence. Phosphorylated residues are highlighted. (B) Cytosolic overexpression of the LRP6 constructs. A549 cells in which control (empty vector, EV, encoding only GFP), miniCL and miniCLMT were transfected as GFP fusion proteins. Control, miniCL and miniCLMT were detected through the green fluorescence from GFP. β-Catenin was detected using an anti-β-catenin antibody, and the nuclei were detected by DAPI staining. (C) Western blotting analysis from the transfected A549 cells used in (B). Labels at the left side of blots indicate the antibody used for detection of the corresponding protein. Endogenous β-catenin was detected by an anti-β-catenin antibody. p-GS indicates the level of the phosphorylated GS by GSK3β, detected by anti-glycogen synthase (Ser641) antibody. p-S9-GSK3β indicates the phosphorylated Ser9 of GSK3β, and was detected by anti-phospho GSK3β (Ser9)

antibody. Levels of transfected proteins were detected using monoclonal GFP antibody, indicated by GFP. Total cellular levels of GS and GSK3 $\beta$  were measured by anti-GS antibody and anti-GSK3 $\beta$  antibody, which are indicated by t-GS and t-GSK3 $\beta$ , respectively. Actin is shown as a loading control. (D) Activation of Wnt/ $\beta$ -catenin signaling, which was measured by the Top-flash luciferase activity. Either the top-flash (TOP) or fop-flash (FOP) luciferase reporter and each construct were transfected into 293 cells. The luciferase activities were measured after 24 h of the transfection. Error bars represent standard deviation from 4 independent experiments. Statistical analysis revealed that overexpression of the miniCL construct significantly activated Wnt/ $\beta$ -catenin signaling compared to that of the empty vector and the miniCLMT construct (\*  $p < 0.01$ , #  $p < 0.01$ ). doi:10.1371/journal.pone.0004046.g001

kinase assay with Axin-bound GSK3 $\beta$  was performed by adding the purified GSK3 $\beta$  binding domain (GBD) of Axin to the reaction mixture. Although full-length Axin increases GSK3 $\beta$  activity toward full-length  $\beta$ -catenin through its scaffolding of GSK3 $\beta$  and  $\beta$ -catenin [22], the Axin GBD domain itself slightly inhibited GSK3 $\beta$  (Fig. 2D), which is consistent with the reduced activity of Fratide-bound GSK3 $\beta$  [23]. As shown in Fig. 2D, the dually-phosphorylated PPPSPxS peptide inhibits Axin-bound GSK3 $\beta$  similarly to free GSK3 $\beta$ . This result is consistent with the crystal structure of GSK3 $\beta$  complexed with Axin, which shows that Axin does not occupy the active site of GSK3 $\beta$  [22]. The *in vitro* inhibition of Axin-bound GSK-3 $\beta$  indicates that the phosphorylated PPPSPxS motifs of LRP6/5 can be an *in vivo* inhibitor of GSK3 $\beta$  in Wnt/ $\beta$ -catenin signaling.

### Microinjection of the peptide containing the phosphorylated PPPSPxS motif into the *Xenopus* embryo potentiates Wnt/ $\beta$ -catenin signaling

It is well established that Wnt signaling reduces GSK3 $\beta$  activity during development of the *Xenopus* embryo [24], and that the suppressed activity of GSK3 $\beta$  induces a second body axis in the *Xenopus* embryo in the response to Wnt [25]. To examine the *in vivo* effect of the PPPSPxS motif on Wnt/ $\beta$ -catenin signaling, we injected the synthetic peptides into *Xenopus* embryos, along with a small amount of *Xenopus* Wnt8 that is insufficient to induce second body axis formation on its own. The dually-phosphorylated peptide [PPP(p)SPx(p)S; Fig. 3] strongly induced the second body axis, whereas the non-phosphorylated peptide [PPPSPxS; Fig. 3] did not. The peptide phosphorylated at only the first Ser residue [PPP(p)SPxS; Fig. 3] induced the second body axis with an efficiency comparable to that of the dually-phosphorylated peptide. This result indicates that the phosphorylated PPPSPxS motif can induce Wnt signaling *in vivo*. Although the amount injected is likely to be higher than physiological concentrations, it is interesting that microinjection of each peptide in the absence of *Xenopus* Wnt8 did not induce a second body axis (data not shown). It is likely that a slight reduction in the GSK3 $\beta$  activity due to the activity of the exogenous Wnt on the endogenous LRP6/5 is required for the peptide to cause a sufficient inhibition of GSK3 $\beta$  to trigger Wnt/ $\beta$ -catenin signaling. Moreover, even if the amount of peptide injected is well above physiological concentrations, the effect is specific to the phosphorylated peptide. Thus, the peptide injection experiments, when considered with the experiments using purified proteins, indicate that the phosphorylated PPPSPxS motif directly inhibits GSK3 $\beta$  and leads to the activation of  $\beta$ -catenin.

It was recently reported that injection of a recombinant portion of the LRP6 cytoplasmic region containing the Ser/Thr rich cluster and the five PPPSPxS motifs induced a second body axis as effectively as the phosphorylated PPPSPxS peptide in the absence of the exogenously-added Wnt ligand, even when the LRP6 protein was not prephosphorylated by GSK3 $\beta$  and CK1 [17]. It seems likely that the longer fragment of the LRP6 cytoplasmic region is phosphorylated by endogenous kinases in the embryo, and has a stronger inhibitory effect on GSK3 $\beta$  due to the multiple PPPSPxS motifs. Also, as we show below, the Ser/Thr-rich region upstream of the PPPSPxS motifs, may have an important role in this process.

### GSK3 $\beta$ preferentially binds to the phosphorylated intracellular region of LRP6

The evidence above suggests that the phosphorylated PPPSPxS motifs of the LRP6/5 intracellular region competitively inhibit GSK3 $\beta$ . The intracellular region of LRP6/5 has been implicated in binding both GSK3 $\beta$  and Axin [6,12,13,16]. Whereas GSK3 $\beta$  bound to LRP6 or 5 in the absence of Axin in yeast two-hybrid experiments [13,16], GSK3 $\beta$  dramatically increased the interaction of Axin with LRP6 or 5 in cells and *in vitro* [6]. Moreover, both the GBD and DIX domains of Axin were present in constructs that interacted with LRP5 in yeast two-hybrid experiments [6]. The Axin-binding site found in vertebrate GSK3 [22] is conserved in the yeast homolog. These observations suggest that GSK3 can associate directly with LRP6 and bridge LRP6 to Axin.

We first investigated whether the intracellular region of LRP6 binds to GSK3 $\beta$  in a phosphorylation-dependent manner. To detect binding, we used recombinant GST-fused LRP6 fragments (miniCL, miniCLMT, PPPSPxS, PPPAPxS; Fig. 1A) and GSK3 $\beta$  proteins in a far western binding assay. This assay is appropriate as the LRP6 cytoplasmic region is expected to be natively unstructured and therefore should not suffer from denaturation artifacts. Prior to the binding reaction, the GST-fused LRP6 fragments were phosphorylated by GSK3 $\beta$  and CK1 and transferred to a PVDF membrane. The membrane was incubated with GSK3 $\beta$ , and bound GSK3 $\beta$  was detected with an anti-GSK3 $\beta$  antibody. GSK3 $\beta$  bound to GST-miniCL and GST-miniCLMT, but not GST-PPPSPxS or GST-PPPAPxS (Fig. 4). Comparison with LRP6 that had not been phosphorylated revealed that phosphorylation enhanced the binding by four to five fold (Fig. 4A *Right*). Since the S1490A mutation does not affect binding, these results suggest that the Ser/Thr rich cluster present in miniCL plays more important role in mediating the phosphorylation-dependent interaction of LRP6 with GSK3 $\beta$ . Also, given the measured  $K_i$  value of the single PPPSPxS motif, it was expected that the single PPPSPxS motif might exert a limited role in recruiting the GSK3 $\beta$ .

To investigate whether the Axin-bound GSK3 $\beta$  is able to bind to the phosphorylated LRP6 fragments (miniCL), we incubated GSK3 $\beta$  with excess Axin GBD protein to saturate its binding to GSK3 $\beta$  and then tested the binding of GSK3 $\beta$  and LRP6 using the same far western blot analysis (Fig. 4B). Binding of GSK3 $\beta$  to the LRP6 fragment was not affected by the presence of Axin, indicating that the Axin GBD, GSK3 $\beta$ , and LRP6 miniCL proteins form a ternary complex *in vitro*. Furthermore, we observed that an Axin fragment including the GBD was bound to the LRP6 miniCL fragment only when GSK3 $\beta$  was co-incubated (Fig. 4C), demonstrating that GSK3 $\beta$  mediates the association of the Axin fragment with the LRP6 intracellular region. Taken together, we propose that the GSK3 $\beta$  plays an important role in mediating Axin binding to LRP6/5 *in vivo* mainly through the Ser/Thr rich cluster of LRP6/5.

### Discussion

Here we have provided evidence that the phosphorylated PPPSPxS motif of LRP6/5 directly inhibits GSK3 $\beta$ . The dually-

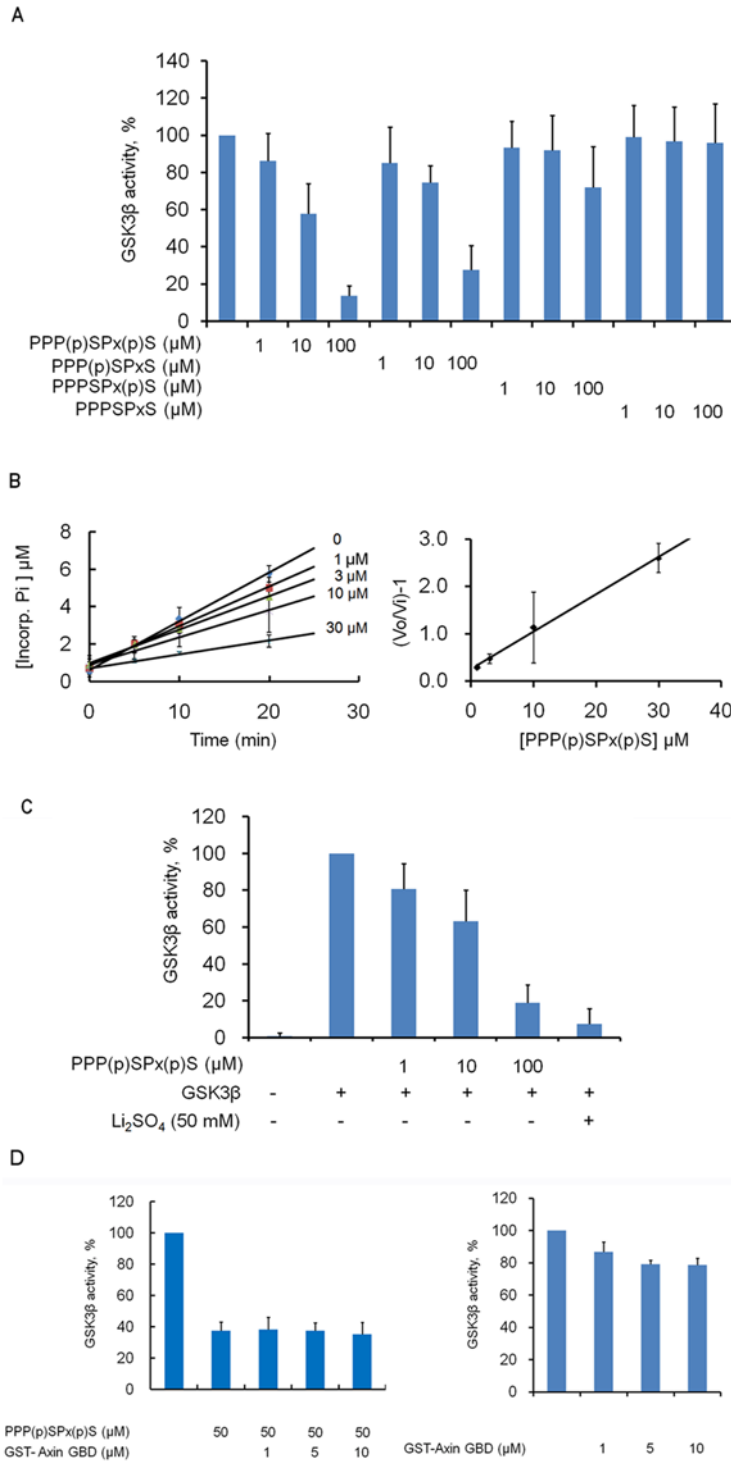

**Figure 2. Direct inhibition of GSK3 $\beta$  on the  $\beta$ -catenin N-terminal fragment by LRP6 PPPSPxS peptides.** (A) GSK3 $\beta$  activity is inhibited by the LRP6 PPPSPxS peptides depending on the phosphorylation state of the LRP6 motif. The graph is plotted as a percentage of uninhibited GSK3 $\beta$  activity (*Lane 1*) from 4–7 independent experiments; the standard deviation is indicated by error bars. Gels used in this experiment are shown in Fig. S5. (B) Measurement of the inhibition constant ( $K_i$ ) of the dually-phosphorylated LRP6 peptide. Varying concentrations (0, 1, 3, 10, and 30  $\mu$ M) of the dually-phosphorylated LRP6 peptide were used to measure the  $K_i$  value. The data points are the mean of three independent experiments. The progressive increase in slope indicates that the  $K_i$  for the peptide is  $\sim$ 13  $\mu$ M. (C) The dually-phosphorylated PPPSPxS peptide inhibits the GSK3 $\beta$ -mediated phosphorylation of mouse Axin fragment (residues 512–650). The intensities of the Coomassie-blue stained phosphorylated bands were quantitatively analyzed. The purified Axin fragment (5  $\mu$ g) was used as a substrate in the same reaction buffer as in (A). The graph is plotted as a percentage of uninhibited GSK3 $\beta$  activity from 3 independent experiments; the standard deviation is indicated by error bars. Gels used in this experiment are shown in Fig. S6. (D) GSK3 $\beta$  is inhibited by the phosphorylated LRP6 motif independently of the Axin GBD protein (*Left*). Binding of Axin GBD to GSK3 $\beta$  is fully saturated at above 2.5  $\mu$ M of the Axin protein [35], where  $\sim$ 20% of the GSK3 $\beta$  activity was inhibited by the Axin GBD protein (*Right*). GST-fused mouse Axin GBD (*GST-Axin GBD*, residues 512–530) was used in these experiments. The graph is plotted as relative GSK3 $\beta$  activities from three independent experiments. Error bars indicate the standard deviation. Because the binding constant of Axin GBD domain to GSK3 $\beta$  is about 1  $\mu$ M, most GSK3 $\beta$  is bound to Axin GBD domain at above 2.5  $\mu$ M of Axin GBD domain *in vitro*. A representative gel is shown in Fig. S7. Binding of Axin GBD to GSK3 $\beta$  was confirmed by the far western blotting experiment (Data not shown). doi:10.1371/journal.pone.0004046.g002

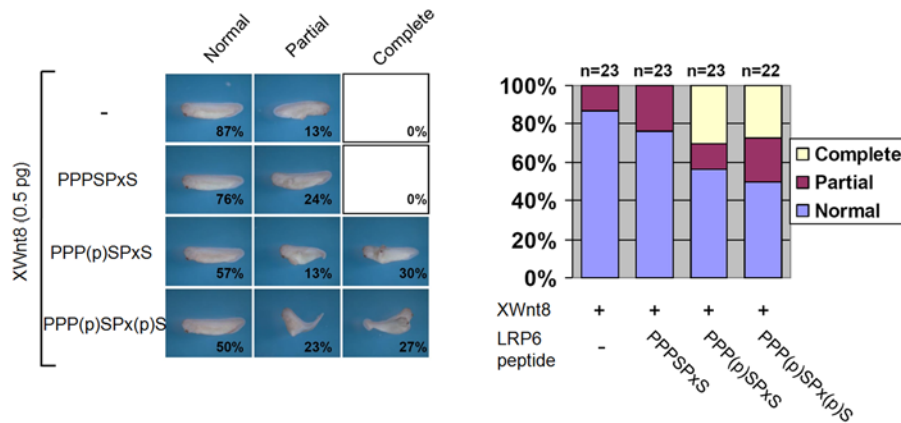

**Figure 3. The effect of the injected PPPSPxS peptides to the *Xenopus* embryos.** *Xenopus* Wnt8 protein (*XWnt8*; 0.5  $\mu$ g) was co-microinjected with each peptide (1 ng) into the ventrovegetal region of *Xenopus* embryos. Representative embryo pictures are shown in the left panel, and the diagram shows the ratio of the phenotypes (normal shape, partial and complete second axis duplication) in the right panel. Although the injected peptides would be diluted and degraded as the cells divide due to lack of the *de novo* biosynthesis, the dually and singly-phosphorylated PPPSPxS peptides dramatically increased partial and complete second body axis. doi:10.1371/journal.pone.0004046.g003

phosphorylated PPPSPxS motif acts as a competitive inhibitor with a  $K_i$  of 13  $\mu$ M. Given this  $K_i$  value, the inhibitory effect of phosphorylated LRP6 on GSK3 $\beta$  is relatively low compared to other cytoplasmic protein inhibitors, such as XIAP ( $K_i$  toward caspase-3  $\sim$ 2 nM [26]), although it is a much stronger inhibitor than the phosphorylated N-terminal segment of GSK3 $\beta$  *in trans*. However, the weak inhibitory effect of the phosphorylated LRP6 on GSK3 $\beta$  could become important when GSK3 $\beta$  and LRP6 are both localized to the membrane, which would bring the enzyme and its inhibitor into close proximity. Moreover, the five PPPSPxS motifs could enhance the avidity of the interaction with GSK3.

Cselenyi et al. (2008) found that the recombinant, nonphosphorylated LRP6 intracellular region at  $\sim$ 4  $\mu$ M can inhibit  $\beta$ -catenin phosphorylation by GSK3 $\beta$ , but not Tau, another GSK3 $\beta$  substrate, which led these authors to propose that GSK3 $\beta$  phosphorylates LRP6 and that the phosphorylated species somehow specifically interferes with the  $\beta$ -catenin–GSK3 $\beta$  interaction rather than inhibiting the kinase. They argue that the inhibition of GSK3 $\beta$  observed by Mi et al. (2006) may have been due to the use of supraphysiological concentrations, although the concentrations used in that study were not reported. We have shown that phosphorylated LRP6 inhibits GSK3 $\beta$  activity towards another substrate, Axin, in a purified system (Fig. 2C), arguing against a  $\beta$ -catenin specific inhibitory activity. We also see inhibition of glycogen synthase when the LRP6 cytoplasmic fragment is overexpressed in cells. Although in this case a free cytosolic LRP6 motif is clearly not physiological, taken with the other data it is clear that the phosphorylated motif can act as a competitive inhibitor of GSK3 $\beta$ . The 13  $\mu$ M  $K_i$  is consistent with the findings of Cselenyi et al. when the avidity of the 5 PPPSPxS motifs is considered. Although the relevant concentration *in vitro* is not known, particularly given the formation of scaffolding complexes at the plasma membrane, it is clear that the phosphorylated motifs act as potent inhibitors.

The cytoplasmic scaffold protein Dishevelled is an indispensable component downstream of Frizzled in Wnt/ $\beta$ -catenin signaling [27]. A large body of evidence suggests that Dishevelled is responsible for the direct recruitment of Axin to the membrane in Wnt/ $\beta$ -catenin signaling, through the interaction of the Dishevelled and Axin DIX domains [28–30]. In this study, we found that the miniCL intracellular region of LRP6/5 has two functional modules, each regulated by their phosphorylation state: the Ser/

Thr rich cluster appears to contribute to the binding of GSK3 $\beta$ , and the PPPSPxS motifs regulate GSK3 $\beta$  activity. The interaction of the Ser/Thr rich cluster with GSK3 $\beta$  suggests that the Ser/Thr rich cluster of LRP6/5 and Dishevelled may synergize in the recruitment of the GSK3 $\beta$ –Axin complex to the membrane upon Wnt stimulation. Concurrently, GSK3 $\beta$  co-localized with Axin at the membrane would be inhibited by the phosphorylated PPPSPxS motifs of LRP6/5.

Our findings suggest a mechanism to account for the role of phosphorylated LRP6 motifs in the initial events of Wnt/ $\beta$ -catenin signaling (Fig. 5). Binding of Wnt to the Frizzled and LRP6/5 receptors promotes binding of Dishevelled to the cytoplasmic region of Frizzled. This membrane-localized Dishevelled recruits the Axin complex mainly through the Axin–Dishevelled interaction and partly through the LRP6 Ser/Thr rich cluster–GSK3 $\beta$  interaction. The membrane-localized GSK3 $\beta$  in the Axin complex, together with CK1 $\gamma$ , phosphorylates the intracellular region of LRP6/5, including the Ser/Thr rich cluster and the five PPPSPxS motifs. The phosphorylated Ser/Thr rich cluster of LRP6/5 has a higher affinity for GSK3 $\beta$ , and may help to maintain the Axin complex at the membrane in conjunction with the Dishevelled–Axin interaction. Finally, GSK3 $\beta$  in the plasma membrane-localized Axin complexes is inhibited by the phosphorylated PPPSPxS motifs of LRP6/5. According to this model, the cytoplasmic GSK3 $\beta$  molecules involved in insulin/IGF-1 signaling would not be recruited to the membrane because of the lack of the Dishevelled–Axin interaction. As such, this model is compatible with the observation that free cytoplasmic GSK3 $\beta$  is not inhibited in response to Wnt stimulation [18,31], thereby insulating the insulin/IGF-1 signaling from the Wnt/ $\beta$ -catenin signaling pathway.

It was previously suggested that the roles of phosphorylated PPPSPxS motif are to recruit  $\beta$ -catenin [17] and Axin [6,12,13,16], which would lead to inhibition of  $\beta$ -catenin phosphorylation by GSK3 $\beta$ . Fluorescence resonant energy transfer between tagged proteins suggested that the LRP6 cytoplasmic region binds to  $\beta$ -catenin in the cell leading to the proposal that inhibition of  $\beta$ -catenin phosphorylation results from the association of the LRP6 region with  $\beta$ -catenin, not from the inhibition of GSK3 $\beta$  [17]. However, we find that intracellular region of LRP6 directly binds to GSK3 $\beta$  through the Ser/Thr rich cluster and thereby mediates the recruitment of Axin, suggesting

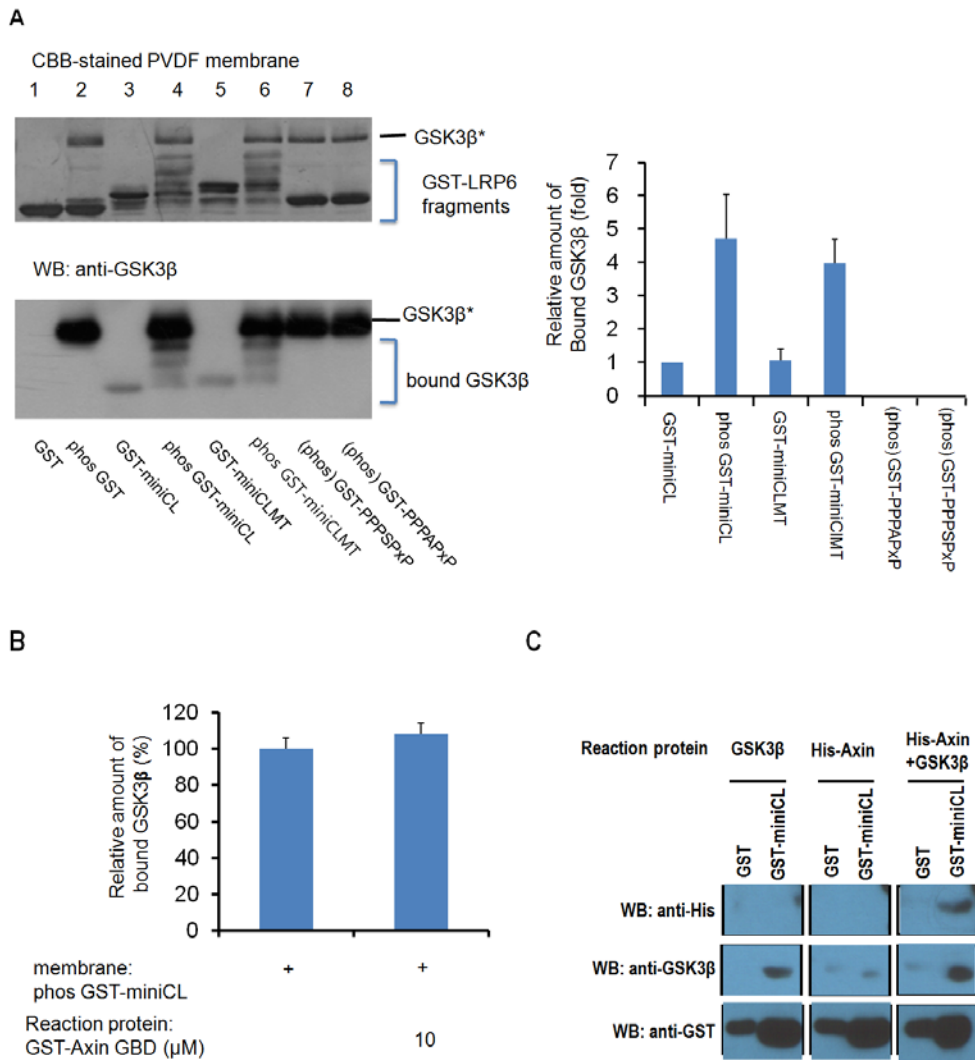

**Figure 4. Phosphorylation-dependent binding of the LRP6 intracellular region to GSK3 $\beta$  in the absence and presence of Axin.** (A) GST (Lane 1), GST-fused miniCL (Lane 3; GST-miniCL), GST-fused miniCLMT (Lane 5; GST-miniCLMT), and their phosphorylated forms (Lanes 2, 4, 6; indicated by “phos”) were loaded onto an SDS-polyacrylamide gel, and then transferred to PVDF membrane (Left top). Because GST-fused PPPSPxS and PPPAPxS were not phosphorylated by GSK3 $\beta$  and CK1 (data not shown), we only applied the GSK3 $\beta$ - and CK1-treated GST-PPPSPxS or its mutant form [Lanes 7, 8; indicated by (phos)] to the gel, since the untreated forms would be redundant. The phosphorylated protein bands show an upshifted mobility on the gel. The PVDF membrane was incubated with 1  $\mu$ g/ml of GSK3 $\beta$  to allow GSK3 $\beta$  to bind to the proteins in the membrane. The bound GSK3 $\beta$  was visualized on the transferred proteins by western blotting using an anti-GSK3 $\beta$  antibody (Left bottom), and the GSK3 $\beta$  protein used to obtain the phosphorylated forms of each protein is indicated by GSK3 $\beta^*$ . The band intensities of bound GSK3 $\beta$  were measured from the three independent experiments (Right). (B) The Axin GBD domain does not affect the binding of GSK3 $\beta$  to the miniCL region of LRP6. The phosphorylated GST-fused miniCL was transferred to PVDF membrane, and the membrane was incubated with GSK3 $\beta$  (0.1  $\mu$ g/ml) and GST-fused Axin GBD domain protein (0, 10  $\mu$ M). Error bars indicate the standard deviation from three independent experiments. (C) GSK3 $\beta$  mediates the binding of an Axin fragment to LRP6 miniCL region. A His-tagged Axin fragment (*His-Axin*; residues 512–650) including the GBD and the  $\beta$ -catenin binding domain (BBD) was tested if it directly binds to LRP6 miniCL region or its binding is mediated by GSK3 $\beta$ . Fifteen  $\mu$ g of GST-miniCL was transferred to a PVDF membrane, and the membrane was incubated with GSK3 $\beta$  (2  $\mu$ g/ml) and/or His-Axin (12  $\mu$ g/ml) in TBST containing 1% skim milk. The Axin fragment was bound to LRP6 miniCL only in the presence of GSK3 $\beta$ . doi:10.1371/journal.pone.0004046.g004

that  $\beta$ -catenin associates indirectly with LRP6 through GSK3 $\beta$  and Axin. Likewise, the ability of GSK3 $\beta$  to bind simultaneously to LRP6 and Axin explains earlier co-immunoprecipitation data [6] that were used to conclude that LRP6 and Axin interact directly. In summary, our results show that the phosphorylated PPPSPxS motif of LRP6 acts as a direct inhibitor of GSK3 $\beta$  in Wnt/ $\beta$ -catenin signaling, and suggest a mechanism for stabilization of  $\beta$ -catenin upon activation of cell surface Wnt receptors.

## Materials and Methods

### Plasmids for transfection

DNA fragments encoding LRP6 miniCL (residues 1470–1510 of human LRP6) were obtained from a human cDNA library by PCR, and inserted into the pEGFP-C1 vector (Clontech) using *HindIII* and *BamHI* sites to generate GFP-tagged protein, resulting in pEGFP-miniCL. The LRP6 mutant (S1490A) was

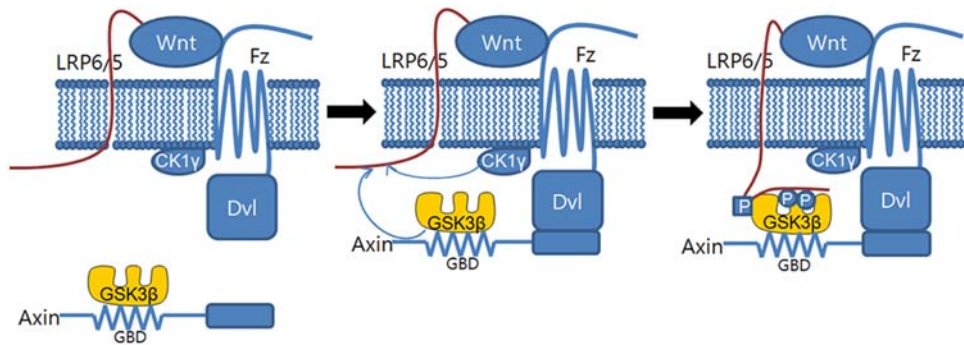

**Figure 5. A model for the activation of Wnt/ $\beta$ -catenin signaling.** *Left*, simultaneous binding of Wnt to Frizzled (Fz) and LRP6/5 leads to recruitment of Dishevelled (Dvl) to the Frizzled cytoplasmic region. *Middle*, the Axin complex containing GSK3 $\beta$  is recruited to the membrane via interactions of Axin with Dishevelled, and also the Ser/Thr rich cluster of LRP6/5 with GSK3 $\beta$  in the complex. The membrane-recruited GSK3 $\beta$ , together with the membrane-anchored CK1 $\gamma$ , phosphorylates the Ser/Thr rich cluster of LRP6. Once the Ser/Thr rich cluster of LRP6/5 is phosphorylated, LRP6/5 makes a greater contribution to the recruitment of the Axin complex due to its increased affinity. *Right*, the GSK3 $\beta$  in the Axin complex is inhibited by the phosphorylated PPPSPxS motif in LRP6/5. The phosphorylated Ser/Thr rich cluster is indicated by p in a square, and the phosphorylated PPPSPxS motif is indicated by p in a circle.  
doi:10.1371/journal.pone.0004046.g005

generated by PCR-mediated mutagenesis, resulting in pEGFP-miniCLMT.

### Antibodies

Antibodies were used according to the manufacturer's instructions. Antibodies used include mouse monoclonal anti- $\beta$ -catenin (Santa Cruz), anti-GFP (Santa Cruz), and rabbit polyclonal anti-GSK3 $\beta$  (Cell signaling), anti-phospho GSK3 $\beta$  (Ser9) (Cell signaling), anti-phospho LRP6 (Ser1490) (Cell signaling), anti-phospho-glycogen synthase (Ser641) (Cell signaling), anti-GS (Cell signaling), anti-phospho- $\beta$ -catenin (Ser45) (Cell signaling), and anti-phospho- $\beta$ -catenin (Ser33/37/Thr41) (Cell signaling).

### Transfection and protein analysis

pEGFP-miniCL and pEGFP-miniCLMT vectors were transfected into A549 cells and HepG2 cells using jetpei according to the manufacturer's protocol (Polyplus transfection). In brief, 2  $\mu$ g of DNA and jetpei mixtures were added to A549 cells and HepG2 cell and incubated for 3 h under serum-free conditions, and then equal volumes of DMEM containing 20% serum were added. After 24 h incubation, cells were harvested using RIPA (containing protease cocktail). Subsequently, 20  $\mu$ g of protein lysates were applied to SDS-PAGE. After transferring the proteins to a PVDF membrane, samples were incubated with the appropriate antibodies, according to standard western blot protocol.

### Luciferase assay

To address the transcriptional activity of  $\beta$ -catenin, TOP-flash (responsive luciferase vector) and FOP-flash (unresponsive vector), which were kindly provided by Drs. B. Vogelstein and K. Kinzler (Johns Hopkins Univ.), were transfected into 293 cells. Using 10  $\mu$ l of cell lysate, we performed the luciferase assay using the luciferase assay kit (Promega).

### Immunofluorescence staining

Transfected cells were fixed with 100% methanol for 20 min at  $-20^{\circ}\text{C}$ . After washing with PBS and subsequent blocking with blocking buffer (PBS+0.05% BSA), fixed cells were incubated with anti- $\beta$ -catenin antibody for 2 h at room temperature. After washing with PBS, cells were incubated with a rhodamine-conjugated anti-mouse antibody for 2 h. To visualize nuclei, cells

were stained with DAPI for 5 min. After washing with PBS, expression of  $\beta$ -catenin, GFP, and DAPI were analyzed using fluorescence microscopy.

### Expression and purification of recombinant proteins

The catalytic domains of mouse GSK3 $\beta$  (residues 27–393) and CK1 $\epsilon$  (residues 1–319) were expressed and purified as previously described [32]. The N-terminal region (residues 1–133) of  $\beta$ -catenin was expressed in *Escherichia coli* as a GST-fusion protein with a TEV protease cleavage site and then purified using Glutathione-agarose. Subsequently, the GST tag was cleaved using recombinant TEV protease and was removed by repeated HiTrapQ anion-exchange chromatography. The N-terminal region of  $\beta$ -catenin was then phosphorylated by incubation with the catalytic domain of CK1 $\epsilon$  (0.28 mg/ml) at  $37^{\circ}\text{C}$  for 20 min in 50 mM Tris buffer (pH 8.0) containing 10 mM  $\text{MgCl}_2$ , 10 mM 2-mercaptoethanol, and 2 mM phenylmethylsulfonylfluoride. The phosphorylated  $\beta$ -catenin fragment was then further purified using HiTrapQ anion-exchange chromatography to remove the CK1 $\epsilon$  enzyme. The mouse Axin GBD (residues 512–530), and variants of human LRP6 (miniCL, residues 1470–1510; miniCLMT, residues 1470–1510 with substitution at Ser1490 with Ala; LRP6 PPPSPxS, residues 1485–1497; and LRP6 PPPAPxS, residues 1485–1497 with the substitution at Ser1490) were expressed in *E. coli* as GST-fusion proteins and purified using Glutathione-agarose and a HiTrapQ anion-exchange chromatographic column. The final buffer for the GST-fusion proteins was changed to 20 mM Tris buffer (pH 8.0) using Centriprep (10 kDa cutoff; Millipore). His-tagged Axin fragment (512–650 in the mouse Axin numbering) was expressed in *E. coli*, and purified using Ni-NTA affinity and HitrapQ anion exchange chromatographic columns.

### Peptide synthesis

Peptides for inhibition assays were prepared by solid-phase synthesis. The amino acid sequence of each peptide is shown in Fig. 1A. The N-terminus and C-terminus of all peptides were modified by biotinylation and amidation, respectively. Biotinylation was accomplished using sulfo-NHS-SS-biotin (Pierce), which allowed reductive cleavage of the 15-mer from the biotin group. The identity and purity of the synthesized peptides were confirmed by mass spectrometry.



### *In vitro* GSK3 $\beta$ activity assay in the presence of synthetic peptides

To measure the GSK3 $\beta$  activity in the presence of each synthetic peptide dissolved in 10% dimethylsulfoxide, 7.5  $\mu$ l of the reaction mixture was incubated for 30 min at 37°C. This reaction mixture contained 50 mM Tris (pH 8.0), 10 mM MgCl<sub>2</sub>, 10 mM 2-mercaptoethanol, 1 mM ATP, 2 ng of recombinant GSK3 $\beta$  catalytic domain, 7  $\mu$ M of the primed  $\beta$ -catenin N-terminal fragment, and the same volume (0.3  $\mu$ l) of varying concentrations of each synthetic peptide. After the reaction was stopped by the addition of SDS-loading buffer and immediate boiling, the resultant mixture was applied to a 15% SDS-polyacrylamide gel for analysis. As shown in Fig. S3, S4, S6, and S7, the intensities of the supershifted bands (substrate, product a, product b) on the Coomassie-stained gel were integrated using the program IMAGE-QUANT (Molecular Dynamics, USA). To calculate the GSK3 $\beta$  activity, the intensities of the two product bands were combined according to the number of phosphate groups incorporated by GSK3 $\beta$ . The lower band (product a) contains one phosphate group ( $\times 1$ ), while the upper (product b) band contains two or three phosphate groups ( $\times 2.5$ ). To examine the effect of Axin GBD on the inhibitory role of the dually-phosphorylated peptide toward GSK3 $\beta$  activity, each concentration of GST-fused Axin GBD protein was added in 7.5  $\mu$ l of the reaction mixture with GSK3 $\beta$ .

### Determination of the $K_i$ value of the phosphorylated LRP6 peptide toward GSK3 $\beta$

Thirty  $\mu$ l of the reaction mixture containing 50 mM Tris (pH 8.0), 10 mM MgCl<sub>2</sub>, 10 mM 2-mercaptoethanol, 1 mM ATP, 8 ng of recombinant GSK3 $\beta$  catalytic domain, 6  $\mu$ M of the primed  $\beta$ -catenin N-terminal fragment, and varying concentrations of dually-phosphorylated peptide were incubated at 37°C. At each time point, 7.5  $\mu$ l was taken from the reaction mixture for SDS-PAGE. The GSK3 $\beta$  activity was measured using a Coomassie-stained SDS-polyacrylamide gel, as described above. The initial parts of the activity curves, which show no curvature, were obtained and their slopes were calculated as initial velocities. The apparent  $K_i$  value was determined according to the equation:  $(V_0/V_i) - 1 = [\text{peptide}]/K_i$ , where  $V_0$  and  $V_i$  are the initial velocities of the reaction in the absence and in the presence of the dually-phosphorylated peptide [19].

### *Xenopus laevis* embryo manipulations

*Xenopus laevis* was purchased from Xenopus I and Nasco. Eggs were obtained from *Xenopus laevis* primed with 800 U of human chorionic gonadotropin (Sigma). *In vitro* fertilization was performed as described previously [33], and the developmental stages of the embryos were determined according to Nieuwkoop and Faber [34]. Microinjection was carried out in 0.33 $\times$ Modified Ringer's (MR) containing 4% Ficoll-400 (GE healthcare) using a Nanoliter Injector (WPI). Injected embryos were cultured in 0.33 $\times$ MR until stage 8 and then transferred to 0.1 $\times$ MR until they had reached the appropriate stage.

### Phosphorylation of GST-fusion proteins

To phosphorylate GST-fusion proteins, 15  $\mu$ g of each GST-fusion protein was incubated for 4 h at 37°C with 0.2  $\mu$ g of recombinant GSK3 $\beta$  and 0.4  $\mu$ g of recombinant CK1 $\epsilon$  in 10  $\mu$ l of 50 mM Tris (pH 8.0) buffer containing 5 mM ATP, 10 mM MgCl<sub>2</sub> and 10 mM 2-mercaptoethanol.

### Far western blotting analysis

GST-fusion proteins (GST-miniCL, GST-miniCLMT, GST-PPPSPxS, GST-PPPAPxS) were subjected to SDS-PAGE and

transferred to a PVDF membrane. The membrane was then blocked for 1 h with 5% skim milk in TBST (20 mM Tris (pH 7.6), 137 mM NaCl, 0.05% Tween 20), and rinsed with TBST. Then the membrane was incubated for 3 h with the 1  $\mu$ g of the recombinant GSK3 $\beta$  in 1 ml of 5% skim milk in TBST, and was washed 3 times with TBST. The binding of GSK3 $\beta$  was detected with rabbit anti-GSK3 $\beta$  antibody and secondary HRP-conjugated goat anti-rabbit IgG (Pierce).

### Supporting Information

**Figure S1** Cytosolic overexpression of the LRP6 constructs in HepG2 cells. HepG2 cells in which control (empty vector, EV, encoding only GFP), miniCL and miniCLMT were transfected as GFP fusion proteins. Control, miniCL and miniCLMT were detected through the green fluorescence from GFP.  $\beta$ -Catenin was detected using an anti- $\beta$ -catenin antibody, and the nuclei were detected by DAPI staining.

Found at: doi:10.1371/journal.pone.0004046.s001 (0.91 MB TIF)

**Figure S2** Western blotting analysis from the transfected HepG2 cells. Labels at the left side of blots indicate the antibody used for detection of the corresponding protein. The endogenous  $\beta$ -catenin level was detected by an anti- $\beta$ -catenin antibody. p-GS indicates the level of the phosphorylated GS by GSK3 $\beta$ , detected by anti-glycogen synthase (Ser641) antibody. p-S9-GSK3 $\beta$  indicates the phosphorylated Ser9 of GSK3 $\beta$ , and was detected by anti-phospho GSK3 $\beta$  (Ser9) antibody. Levels of transfected proteins were detected using monoclonal GFP antibody, indicated by GFP. Pan-Ras is shown as a loading control.

Found at: doi:10.1371/journal.pone.0004046.s002 (0.05 MB TIF)

**Figure S3** *In vitro* GSK3 $\beta$  activity assay based on band-shifts. The numbers at the right indicate the numbers of the incorporated phosphate groups by CK1 or GSK3 $\beta$ . We used unphosphorylated  $\beta$ -catenin 1–133 region (0) as a substrate, and CK1 and GSK3 $\beta$  proteins were sequentially treated in the reaction buffer used in Fig. 2. The bands for GSK3 $\beta$  substrate is indicated by “substrate”, and the product bands are indicated by “product a” and “product b”. The bands were visualized by Coomassie staining.

Found at: doi:10.1371/journal.pone.0004046.s003 (0.16 MB TIF)

**Figure S4** *In vitro* GSK3 $\beta$  kinase assay based on the phospho-specific antibodies against  $\beta$ -catenin. Unphosphorylated  $\beta$ -catenin 1–133 region (0) was used as a substrate, and CK1 and/or GSK3 $\beta$  was treated simultaneously in the same reaction buffer used in Fig. 2. To confirm the inhibitory role of the PPPSPxS peptides, each peptide was added to the reaction mixture. SDS-PAGE was applied to analyze the result. One of gels was stained by Coomassie blue (Top), the other two gels were transferred to PVDF membranes. One membrane was visualized using anti-phospho- $\beta$ -catenin (Ser45) antibody (Middle), and the other membrane was visualized using anti-phospho- $\beta$ -catenin (Ser33/37/Thr41) antibody (Bottom). The results are well-consistent with Fig. S1 and Fig. S2, which confirms the fidelity of the *in vitro* kinase assay used in this study.

Found at: doi:10.1371/journal.pone.0004046.s004 (0.23 MB TIF)

**Figure S5** Gel figures for Fig. 2A. The bands labeled “substrate” are the prephosphorylated  $\beta$ -catenin 1–133 fragment by CK1. The two product bands are indicated.

Found at: doi:10.1371/journal.pone.0004046.s005 (0.49 MB TIF)

**Figure S6** Gel figures for Fig. 2C. The bands labeled substrate are the unphosphorylated Axin fragment, and the band labeled product is the Axin fragment harboring phosphorylation at Ser614. Prior to the experiment, we found that the GSK3 $\beta$ -

mediated phosphorylation of the Axin fragment can be detected through a band upshift of the fragment on an SDS-polyacrylamide gel. The reaction buffer was the same as in Fig. S2, and the incubation time was 1 hour. In a control experiment, the primed  $\beta$ -catenin (1–133) was used as a substrate using the same amount of GSK3 $\beta$  and reaction buffer, but was incubated for 15 min (See the “control” lanes in the first gel).

Found at: doi:10.1371/journal.pone.0004046.s006 (0.22 MB TIF)

**Figure S7** A representative gel for Fig. 2D.

Found at: doi:10.1371/journal.pone.0004046.s007 (0.11 MB TIF)

## References

- Wodarz A, Nusse R (1998) Mechanisms of Wnt signaling in development. *Annu Rev Cell Dev Biol* 14: 59–88.
- He X, Semenov M, Tamai K, Zeng X (2004) LDL receptor-related proteins 5 and 6 in Wnt/beta-catenin signaling: arrows point the way. *Development* 131: 1663–1677.
- Aberle H, Bauer A, Stappert J, Kispert A, Kemler R (1997) beta-catenin is a target for the ubiquitin-proteasome pathway. *EMBO J* 16: 3797–3804.
- Orford K, Crockett C, Jensen JP, Weissman AM, Byers SW (1997) Serine phosphorylation-regulated ubiquitination and degradation of beta-catenin. *J Biol Chem* 272: 24735–24738.
- Bienz M, Clevers H (2003) Armadillo/beta-catenin signals in the nucleus—proof beyond a reasonable doubt? *Nat Cell Biol* 5: 179–182.
- Mao J, Wang J, Liu B, Pan W, Farr GH 3rd, et al. (2001) Low-density lipoprotein receptor-related protein-5 binds to Axin and regulates the canonical Wnt signaling pathway. *Mol Cell* 7: 801–809.
- Tamai K, Zeng X, Liu C, Zhang X, Harada Y, et al. (2004) A mechanism for Wnt coreceptor activation. *Mol Cell* 13: 149–156.
- Cong F, Schweizer L, Varmus H (2004) Wnt signals across the plasma membrane to activate the beta-catenin pathway by forming oligomers containing its receptors, Frizzled and LRP. *Development* 131: 5103–5115.
- Kikuchi A, Yamamoto H, Kishida S (2007) Multiplicity of the interactions of Wnt proteins and their receptors. *Cell Signal* 19: 659–671.
- Zeng X, Huang H, Tamai K, Zhang X, Harada Y, et al. (2008) Initiation of Wnt signaling: control of Wnt coreceptor Lrp6 phosphorylation/activation via frizzled, dishevelled and axin functions. *Development* 135: 367–375.
- Bilic J, Huang YL, Davidson G, Zimmermann T, Cruciat CM, et al. (2007) Wnt induces LRP6 signalosomes and promotes dishevelled-dependent LRP6 phosphorylation. *Science* 316: 1619–1622.
- Davidson G, Wu W, Shen J, Bilic J, Fenger U, et al. (2005) Casein kinase 1 gamma couples Wnt receptor activation to cytoplasmic signal transduction. *Nature* 438: 867–872.
- Zeng X, Tamai K, Doble B, Li S, Huang H, et al. (2005) A dual-kinase mechanism for Wnt co-receptor phosphorylation and activation. *Nature* 438: 873–877.
- Mani A, Radhakrishnan J, Wang H, Mani A, Mani MA, et al. (2007) LRP6 mutation in a family with early coronary disease and metabolic risk factors. *Science* 315: 1278–1282.
- Mi K, Johnson GV (2005) Role of the intracellular domains of LRP5 and LRP6 in activating the Wnt canonical pathway. *J Cell Biochem* 95: 328–338.
- Mi K, Dolan PJ, Johnson GV (2006) The low density lipoprotein receptor-related protein 6 interacts with glycogen synthase kinase 3 and attenuates activity. *J Biol Chem* 281: 4787–4794.
- Cselenyi CS, Jernigan KK, Tahinci E, Thorne CA, Lee LA, et al. (2008) LRP6 transduces a canonical Wnt signal independently of Axin degradation by inhibiting GSK3's phosphorylation of beta-catenin. *Proc Natl Acad Sci U S A* 105: 8032–8037.
- Ding VW, Chen RH, McCormick F (2000) Differential regulation of glycogen synthase kinase 3beta by insulin and Wnt signaling. *J Biol Chem* 275: 32475–32481.
- Zhou Q, Snipas S, Orth K, Muzio M, Dixit VM, et al. (1997) Target protease specificity of the viral serpin CrmA. Analysis of five caspases. *J Biol Chem* 272: 7797–7800.
- Dajani R, Fraser E, Roe SM, Young N, Good V, et al. (2001) Crystal structure of glycogen synthase kinase 3 beta: structural basis for phosphate-primed substrate specificity and autoinhibition. *Cell* 105: 721–732.
- Jho E, Lomvardas S, Costantini F (1999) A GSK3beta phosphorylation site in axin modulates interaction with beta-catenin and Tcf-mediated gene expression. *Biochem Biophys Res Commun* 266: 28–35.
- Dajani R, Fraser E, Roe SM, Yeo M, Good VM, et al. (2003) Structural basis for recruitment of glycogen synthase kinase 3beta to the axin-APC scaffold complex. *EMBO J* 22: 494–501.
- Thomas GM, Frame S, Goedert M, Nathke I, Polakis P, et al. (1999) A GSK3-binding peptide from FRAT1 selectively inhibits the GSK3-catalysed phosphorylation of axin and beta-catenin. *FEBS Lett* 458: 247–251.
- Dominguez I, Green JB (2000) Dorsal downregulation of GSK3beta by a non-Wnt-like mechanism is an early molecular consequence of cortical rotation in early Xenopus embryos. *Development* 127: 861–868.
- He X, Saint-Jeannet JP, Woodgett JR, Varmus HE, Dawid IB (1995) Glycogen synthase kinase-3 and dorsoventral patterning in Xenopus embryos. *Nature* 374: 617–622.
- Takahashi R, Deveraux Q, Tamm I, Welsh K, Assa-Munt N, et al. (1998) A single BIR domain of XIAP sufficient for inhibiting caspases. *J Biol Chem* 273: 7787–7790.
- Wallington JB, Habas R (2005) The developmental biology of Dishevelled: an enigmatic protein governing cell fate and cell polarity. *Development* 132: 4421–4436.
- Cliffe A, Hamada F, Bienz M (2003) A role of Dishevelled in relocating Axin to the plasma membrane during wingless signaling. *Curr Biol* 13: 960–966.
- Julius MA, Schelbert B, Hsu W, Fitzpatrick E, Jho E, et al. (2000) Domains of axin and dishevelled required for interaction and function in wnt signaling. *Biochem Biophys Res Commun* 276: 1162–1169.
- Yanagawa S, Lee JS, Haruna T, Oda H, Uemura T, et al. (1997) Accumulation of Armadillo induced by Wingless, Dishevelled, and dominant-negative Zeste-White 3 leads to elevated DE-cadherin in Drosophila clone 8 wing disc cells. *J Biol Chem* 272: 25243–25251.
- Pearl LH, Barford D (2002) Regulation of protein kinases in insulin, growth factor and Wnt signalling. *Curr Opin Struct Biol* 12: 761–767.
- Ha NC, Tonzuka T, Stamos JL, Choi HJ, Weis WI (2004) Mechanism of phosphorylation-dependent binding of APC to beta-catenin and its role in beta-catenin degradation. *Mol Cell* 15: 511–521.
- Newport J, Kirschner M (1982) A major developmental transition in early Xenopus embryos: I. characterization and timing of cellular changes at the midblastula stage. *Cell* 30: 675–686.
- Nieuwkoop P, Faber J (1967) *Normal Table of Xenopus laevis* (Daudin). Amsterdam: North-Holland.
- Fraser E, Young N, Dajani R, Franca-Koh J, Ryves J, et al. (2002) Identification of the Axin and Frat binding region of glycogen synthase kinase-3. *J Biol Chem* 277: 2176–2185.

## Author Contributions

Conceived and designed the experiments: SO JKH BJP WW NCH. Performed the experiments: SP SHL HK SY SJL BJP. Analyzed the data: SP JLS JL JKH BJP WW NCH. Contributed reagents/materials/analysis tools: JLS YX JL SO WW NCH. Wrote the paper: SP BJP WW NCH.
